# Supplementary material for: Rationale and design of a cross-sectional study to investigate and describe the chronotype of patients with type 2 diabetes and the effect on glycaemic control: the CODEC study
Source: PubMed Central journal article supplement — BMJ Open. 2019 Nov 11;9(11):e027773. doi: 10.1136/bmjopen-2018-027773 (PMC6858123; doi:10.1136/bmjopen-2018-027773), 2019-11-11
Supplement: bmjopen-2018-027773.draft_revisions.pdf [file bmjopen-2018-027773.draft_revisions.pdf]

# BMJ Open

BMJ Open is committed to open peer review. As part of this commitment we make the peer review history of every article we publish publicly available.

When an article is published we post the peer reviewers' comments and the authors' responses online. We also post the versions of the paper that were used during peer review. These are the versions that the peer review comments apply to.

The versions of the paper that follow are the versions that were submitted during the peer review process. They are not the versions of record or the final published versions. They should not be cited or distributed as the published version of this manuscript.

BMJ Open is an open access journal and the full, final, typeset and author-corrected version of record of the manuscript is available on our site with no access controls, subscription charges or pay-per-view fees (<http://bmjopen.bmj.com>).

If you have any questions on BMJ Open's open peer review process please email [info.bmjopen@bmj.com](mailto:info.bmjopen@bmj.com)

# BMJ Open

## The rationale and design of a cross-sectional study to investigate and describe the Chronotype of Patients with Type 2 Diabetes and the Effect on Glycaemic Control: The CODEC study

|                               |                                                                                                                                                                                                                                                                                                                                                                                                                                                                                                                                                                                                                                                                                                                                                                                                                                                                                                                                 |
|-------------------------------|---------------------------------------------------------------------------------------------------------------------------------------------------------------------------------------------------------------------------------------------------------------------------------------------------------------------------------------------------------------------------------------------------------------------------------------------------------------------------------------------------------------------------------------------------------------------------------------------------------------------------------------------------------------------------------------------------------------------------------------------------------------------------------------------------------------------------------------------------------------------------------------------------------------------------------|
| Journal:                      | <i>BMJ Open</i>                                                                                                                                                                                                                                                                                                                                                                                                                                                                                                                                                                                                                                                                                                                                                                                                                                                                                                                 |
| Manuscript ID                 | bmjopen-2018-027773                                                                                                                                                                                                                                                                                                                                                                                                                                                                                                                                                                                                                                                                                                                                                                                                                                                                                                             |
| Article Type:                 | Protocol                                                                                                                                                                                                                                                                                                                                                                                                                                                                                                                                                                                                                                                                                                                                                                                                                                                                                                                        |
| Date Submitted by the Author: | 06-Nov-2018                                                                                                                                                                                                                                                                                                                                                                                                                                                                                                                                                                                                                                                                                                                                                                                                                                                                                                                     |
| Complete List of Authors:     | Brady, Emer M.; NHS Trust, Leicester Diabetes Centre<br>Hall, Andrew; NHS Trust, Leicester Diabetes Centre<br>Baldry, Emma; NIHR Leicester-Loughborough Diet, Lifestyle and Physical Activity Biomedical Research Unit, UK,<br>Chatterjee, Sudesna; University of Leicester, Leicester Diabetes Centre<br>Daniels, Lois; NHS Trust, Leicester Diabetes Centre<br>Edwardson, Charlotte; University of Leicester,<br>Khunti, Kamlesh; University of Leicester, Department of Health Sciences<br>Patel, Mubarak; University of Leicester, Leicester Diabetes Centre<br>Henson, Joseph; NIHR Leicester-Loughborough Diet, Lifestyle and Physical Activity Biomedical Research Unit, UK<br>Rowlands, Alex; Diabetes Research Centre. University of Leicester.<br>Leicester<br>Smith, Alice<br>Yates, Thomas; University of Leicester, Diabetes Research Centre<br>Davies, Melanie; University of Leicester, Diabetes Research Centre |
| Keywords:                     | Chronotype,, social jet-lag, Type-2-diabetes, cardiometabolic health, lifestyle                                                                                                                                                                                                                                                                                                                                                                                                                                                                                                                                                                                                                                                                                                                                                                                                                                                 |
|                               |                                                                                                                                                                                                                                                                                                                                                                                                                                                                                                                                                                                                                                                                                                                                                                                                                                                                                                                                 |

SCHOLARONE™  
Manuscripts

1  
2  
3  
4  
5  
6  
7  
8  
9  
10  
11  
12  
13

# Protocol for a cross-sectional study to investigate and describe the Chronotype of Patients with Type 2 Diabetes and the Effect on Glycaemic Control: The CODEC study

14 EM Brady<sup>1</sup>, AP Hall<sup>2</sup>, E Baldry<sup>1</sup>, S Chatterjee<sup>3</sup>, L Daniels<sup>1</sup>, CL Edwardson<sup>3</sup>, K Khunti<sup>3</sup>, MI Patel<sup>3</sup>, J Henson<sup>3</sup>, AV Rowlands<sup>3</sup>, A Smith<sup>4</sup>, T Yates<sup>3</sup>, MJ Davies<sup>3</sup>.

16  
17  
18

## *Affiliations*

19  
20  
21

<sup>1</sup>Leicester Diabetes Centre, University Hospitals of Leicester NHS Trust, UK

22  
23

<sup>2</sup>The Hanning Sleep Laboratory, University Hospitals of Leicester NHS Trust, UK

24  
25

<sup>3</sup>Diabetes Research Centre, University of Leicester, UK

26  
27  
28  
29  
30  
31  
32  
33  
34  
35  
36  
37

<sup>4</sup> John Walls Renal Unit, University Hospitals of Leicester NHS Trust, UK and Department of Infection, Immunity and Inflammation, University of Leicester, UK

38  
39  
40  
41  
42  
43  
44  
45

Word Count: 2,887

46  
47

Corresponding author

48  
49

Dr E M Brady

50  
51

Leicester Diabetes Centre – Air

52  
53

Leicester General Hospital

54  
55

Gwendolen Road

56  
57

Leicester

58  
59

LE54PW

60

[emer.brady@uhl-tr.nhs.uk](mailto:emer.brady@uhl-tr.nhs.uk)

0116 258 8959

## **Abstract**

*Introduction*

1  
2  
3 A person's chronotype is their entrained preference for sleep time within the 24-hour clock. It  
4 is described by the well-known concept of the 'lark' (early riser) and 'owl' (late sleeper).  
5 Evidence suggests that the 'owl' is metabolically disadvantaged due to the standard  
6 organisation of our society which favours the 'lark' and places physiological stresses on this  
7 chronotype. The aim of this study is to explore cardiometabolic health between the lark and  
8 owl in a population with an established metabolic condition - Type 2 Diabetes.  
9

### 10 *Methods*

11 This cross-sectional, multi-site study aims to recruit 2247 participants from both secondary  
12 and primary care settings. The primary objective is to compare glycaemic control between  
13 late and early chronotypes. Secondary objectives include determining if late-chronotype is  
14 associated with poorer cardiometabolic health and other lifestyle factors, including well-being,  
15 compared to early-chronotype; describing the prevalence of the five different chronotypes in  
16 this cohort and examining the trends in glycaemic control, cardiometabolic health, well-being  
17 and lifestyle factors across chronotype.  
18  
19

### 20 *Analysis*

21 The primary outcome (HbA1c), linear regression analysis will compare HbA1c between early  
22 and late chronotypes, with and without adjustment for confounding variables. Chronotype will  
23 be modelled as a categorical variable with all five levels (from extreme-morning to extreme-  
24 late type), and as a continuous variable to calculate p for trend across the five categories. A  
25 number of models will be created; unadjusted through to adjusted with age, sex, ethnicity,  
26 BMI, duration of diabetes, family history of diabetes, current medication and dietary habits.  
27 All secondary outcomes will be analysed using the same method.  
28  
29

### 30 *Ethics*

31 Ethical approval from the West Midlands - Black Country Research Ethics Committee  
32 (16/WM/0457).  
33

### 34 *Dissemination*

35 The results will be disseminated through publication in peer reviewed medical journal,  
36 relevant medical/health conferences and a summary report sent to patients.  
37

### 38 *Registration details*

39 Registered on clinicaltrials.gov NCT02973412 (23.11.20116)  
40  
41  
42  
43  
44

### 45 **Article summary**

46 Strengths and limitations of this study (up to 5 bullet points no longer than 1 sentence  
47 relating to methods)  
48

- 49 • A large phenotyped cohort of patients with established T2DM for chronotype, levels  
50 of social jet lag and other parameters of sleep, physical activity and dietary  
51 behaviours and timing in addition to cardio-metabolic profiling.
- 52 • Objective and subjective measures chronotype, levels of social jet lag and other  
53 parameters of sleep and physical activity in this large cohort collected.
- 54 • Cross-sectional study design therefore cannot establish causality of any identified  
55 associations.  
56

### 57 **Key Words**

58 Chronotype, social jet-lag, Type-2-diabetes, cardiometabolic health, lifestyle  
59  
60

## Introduction

The incidence and prevalence of diabetes mellitus has now reached over 4 million in the UK [1]. Type 2 diabetes mellitus (T2DM) accounts for approximately 90% of the UK population with diabetes and confers significant morbidity and mortality on patients and healthcare systems. Despite new therapies and management tools to improve quality of life and outcomes for patients with T2DM, cardiovascular disease (CVD) remains the greatest cause of mortality. New paradigms for characterising and treating these patients could enhance current T2DM management.

Recently, there has been considerable interest in the association between quantity and quality of sleep and circadian rhythms and the development of cardiometabolic disease especially metabolic syndrome, T2DM and CVD [2]. A “U”-shaped relationship exists between sleep duration and T2DM, obesity, CVD, hypertension and stroke [3-6]. A meta-analysis of nearly 500,000 individuals (~4% T2DM) identified a relative risk (RR) of 1.14 (95% CI 1.03-1.26) for every additional hour of sleep and RR 1.09 (95% CI 1.04-1.15) with each hour of shorter sleep compared to 7-hours sleep per day for the development of T2DM [7]. The negative impact of poor sleep on health is not widely known and subsequently, lifestyle choices, societal pressures and shift-work are rendering the population chronically sleep deprived and thus at increased risk of metabolic dysfunction. Indeed, the Sleep Council estimates that one third of Britons sleep for just five-to-six hours per night which is well below the recommended 7-8 hours per night [8].

Sleep is regulated, in part, by a homeostatic drive and is therefore unavoidable in humans (without sleep disorders). The circadian system, our internal clock, is also responsible for the regulation of sleep. Sleep is a multidimensional behaviour (and biological process) where we need to not only consider duration and quality but also timing. A person's sleep pattern, in relation to the 24-hour clock, i.e. timing, is individual to them and referred to as their chronotype. We can quantify these individual differences in daily timing using a number of questionnaire based tools and objectively using for example accelerometers.

Five different chronotypes have been identified using the ‘Morningness-Eveningness’ Questionnaire i.e. definite evening type, moderate evening type, intermediate, moderate morning type and definite morning type [9]. The identification of these different chronotypes, which describes preferred circadian phases, into, at the two extremes, the ‘lark’ (early riser) and ‘owl’ (late sleeper) has led to further research confirming that “owls” are at greater risk of cardiometabolic disease [10-12]. The underlying causes have not been clearly defined but appear to be related to circadian misalignment causing chronic sleep deprivation and leading to dysregulation of metabolic, immune and hormonal processes that govern energy regulation and glycaemic control [13-15].

The concept of “social jetlag” has been developed to describe the deleterious effects of chronic sleep deprivation related to weekday occupational obligations on “evening types” and weekend social demands on “morning types” [16]. These social pressures result in a disconnect or misalignment of entrained preference for sleep time and actual sleep time. Evidence of the deleterious effects of social jetlag is emerging. For example, a large epidemiological study in Germany has shown that social jetlag is associated with obesity [17]. A recent systematic review reported associations between increasing levels of social jetlag and poorer mental health, epilepsy, cognitive impairment (e.g., work and academic performance), and adverse endocrine profiles [18].

In this cross-sectional observational study, we therefore propose to extensively phenotype a sample of patients who have an existing chronic metabolic condition - T2DM, to determine the impact of chronotype and levels of social jet lag on their glycaemic control, insulin resistance, biochemical and inflammatory profiles, and lifestyle behaviours using a variety of subjective and objective measures. This will build on the existing evidence base and permits exploration of the interrelationship between sleep behaviours, glycaemic control,

cardiometabolic health and other lifestyle factors including wake-time activity and temporal eating habits in a multi-ethnic cohort with established T2DM.

## Methods and analysis

### Study design and population

This is a cross-sectional, multi-site observational study design. Two thousand, two hundred and forty-seven patients with established T2DM (>6months), between the age of 18-75 years inclusive, without a current known sleep disorder (excluding Obstructive Sleep Apnoea (OSA)) will be recruited from both primary and secondary care settings from four sites across the East Midlands, UK.

### Inclusion/exclusion criteria

#### *Inclusion Criteria*

- Participant is willing and able to give informed consent for participation in the study
- Established T2DM (>6months since diagnosis)
- Male or Female
- Aged 18-75 years inclusive
- BMI less than or equal to 45kg/m<sup>2</sup> inclusive
- No known sleep disorders except OSA
- HbA1c up to and below 10% (86mmol/mol)
- Type 1 Diabetes
- Good command of the English language

#### *Exclusion Criteria*

- Participant is unwilling or unable to give informed consent
- Anyone without a good command of the English language
- Anyone <18 years of age and >75 years of age
- HbA1c above 10% (86mmol/mol)
- BMI greater than 45 kg/m<sup>2</sup>
- A regular cannabis user ie weekly use
- Have a terminal illness
- A known sleep disorder that is not OSA
- Regular use (≥ weekly) of the following medications;
  - wakefulness promoting agents Modafinil, Amphetamine derivatives, Methylphenidate
  - sedatives including benzodiazepines, Z-drugs (zopiclone, zolpidem & zaleplon)
  - Melatonin, including Circadin and melatonin analogues
  - Clonazepam and other drugs for nocturnal movement disorders

### Sample Size

The primary objective is to determine if late-chronotype is associated with poorer glycaemic control compared to early-chronotype in this multi-ethnic cohort with established T2DM as assessed by HbA1c. In order to detect a minimum clinically significant difference in HbA1c of 0.4% between the two groups, assuming a standard deviation of 1.8% [7,8], power of 80%, significance level of 5% and aiming to recruit approximately 50% morning type, 40% intermediate and 10% evening types [8], 1910 participants were required. This has been inflated by 15% to include incomplete dataset collection and withdrawal of consent. Therefore, a total of 2247 participants with T2DM are required for this study.

Secondary outcomes include; determining the prevalence of different chronotypes in this patient population, determine if late-chronotype is associated with poorer cardiometabolic health and other lifestyle factors, including well-being, compared to early-chronotype. We will describe the prevalence and phenotype of the five different chronotypes in a multi-ethnic UK population with established T2DM. Finally we will examine the trends in glycaemic control, cardiometabolic health, well-being and lifestyle factors across the five chronotype categories. All of the above will be explored within the context of social jet lag using a number of definitions for this construct [16, 19, 20].

### Study Assessments

This study involves a single data collection visit lasting approximately 1-1.5 hours. No data will be collected until informed consent has been provided by the participant. Where possible, data collection will be integrated with pre-planned clinic appointments within outpatient departments. Where this is not possible, and for those recruited from primary care, specific study data collection visits will be arranged locally.

### Routine data

The following data will be taken (where possible) from the patients notes following their routine appointment if they are recruited via either secondary or primary care, otherwise this data will be collected at their data collection appointment: date of birth, ethnicity, gender, HbA1c, random plasma glucose, full lipid profile, LFTs, eGFR, Creatinine, blood pressure, weight, body mass index (BMI) and waist circumference.

### Additional study-related data to be collected

#### Bioimpedance assessment

We will conduct a bioimpedance assessment (BIA) on participants to determine body composition. We will use a TANITA® professional body composition monitor (SA 165A-095OU-3, Sino-American Electronics Co.Ltd, Taiwan).

### Questionnaires

A number of questionnaire will be administered to obtain self-reported measures of a number of outcomes detailed in the table 1.

| Outcome                                                       | Questionnaire                                                | Items | Time complete (mins) | Score                                                                                           |
|---------------------------------------------------------------|--------------------------------------------------------------|-------|----------------------|-------------------------------------------------------------------------------------------------|
| Chronotype [9]                                                | 'Morningness-Eveningness Questionnaire (MEQ)                 | 19    | 5                    | 16-86 and is categorised into 3 groups ranging from evening (16-53) to morning (64-86)[21]      |
| Physical activity [22]                                        | Recent Physical Activity Questionnaire (RPAQ)                | 57    | 5                    | Metabolic cost in metabolic equivalent tasks (MET) is calculated – overall and for each section |
| Intake of Pathogen Associated Molecular Patterns (PAMPs) [23] | Pathogen Associated Molecular Patterns (PAMPs) Questionnaire | 13    | 5                    | 0-5 all questions except questions 9 and 10 (0-4). Total provides the global score.             |
| Risk of OSA                                                   | STOP-BANG Questionnaire                                      | 8     | 2                    | A score of 5-8 indicates a high probability of moderate-severe OSA.                             |
| Excessive                                                     | Epworth                                                      | 8     | 2                    | A total score between 0-9                                                                       |

|                         |                                   |    |   |  |                                                                                                                                         |
|-------------------------|-----------------------------------|----|---|--|-----------------------------------------------------------------------------------------------------------------------------------------|
| daytime sleepiness [24] | Sleepiness Scale (ESS)            |    |   |  | indicative of no-daytime sleepiness, 10-12 borderline, >12 describes excessive daytime sleepiness.                                      |
| Physical function [25]  | Duke Activity Status Index (DASI) | 12 | 5 |  | The final score is the sum of all those questions returning a 'yes' with a higher score indicating a higher level of physical function. |

Table 1: Questionnaires used in CODEC study

SINBAD and foot characteristics (only applicable to patients recruited in diabetes foot clinics)[26] For patients recruited from diabetes foot clinics, the SINBAD score will be calculated. The SINBAD score is a classification system and score which compares outcomes of foot ulcer management. It is derived by six factors; Site, Ischemia, Neuropathy, Bacterial infection, Area, Depth.

The participants offloading foot cast information will also be recorded. For this there are five categories:

- Below knee non-removable device/cast
- Below knee removable device/cast
- Non-removable foot device/cast
- Removable foot device/cast
- Usual orthotic/own shoes

#### Medical History

Family history pertaining to cardiovascular disease, diabetes, obesity and depression will be obtained. Medical history will be collected and current concomitant medication in addition to smoking status and duration of diabetes. All those with an existing diagnosis of Obstructive Sleep Apnoea (OSA) will have the severity of their condition and compliance to therapy recorded. This will be collected in the Case Report Form by the study clinician, research nurse or other appropriately trained member of the research team. Further, previous employment pertaining to previous night shift work for retired participants will be collected.

#### Biochemistry

Fasted venous blood samples (at least 4 hours of abstinence from food and anything other than water to drink) will be taken (9ml EDTA) for the quantification of biological markers of metabolism and inflammation (e.g.; hsCRP, IL-6, Leptin, Adiponectin) and a sample for C-peptide and insulin (2.7ml Lithium Heparin). These will be centrifuged and plasma aliquoted at source and stored at -80C at the Leicester Diabetes Department (LDC). Samples will be analysed for hsCRP, IL-6, Leptin, Adiponectin in batch, the remaining aliquots will be stored for future research, and this may be indefinitely.

#### Physical Performance

##### Hand grip strength

Grip strength will be measured, using a digital hand held dynamometer, three times on each side, with the elbow flexed at a right angle and the forearm in neutral position. The maximum of the readings generated is taken as the maximum grip strength.

##### Short Physical Performance Battery (SPPB)

The SPPB measures balance, gait speed and ability to stand from a chair and has been

1  
2  
3 shown to measure the risk of disability and mortality [27]. It comprises of the tests outlined;  
4

- 5 • Chair stands: The participant will start from a seated position on a hard, upright chair  
6 (such as a dining chair), with the feet flat on the floor and the knees bent at 90°. For  
7 the test, the time taken for the participant to stand up fully and then returning to sitting,  
8 without using the hands 5 times is measured.  
9
- 10 • Standing balance: Tests in three progressive positions. If the participant is able to  
11 complete 10 seconds in the specified position then the starting position is progressed  
12 to the next stage:
  - 13 ○ Feet together
  - 14 ○ Semi-tandem
  - 15 ○ Tandem
- 16 • Gait speed: The time taken for the participant to walk 4m on a level course. It is  
17 measured a second time after a short break.  
18

#### 19 Sit-to-stand 60 test (STS60)

20 This test is similar to the chair standing test from the SPPB, but it measures how many times  
21 the participant can stand from a chair in 60 seconds. It is a surrogate measure of muscular  
22 endurance, therefore providing data on an additional marker of physical ability.  
23

#### 24 Sub-studies

##### 25 Genetics

26 **A venous blood sample will be taken for genetic analysis with a focus on clock genes**  
27 and genes that increase the risk of diabetes and obesity. This will be a 9ml EDTA sample of  
28 whole blood that will be transferred within 12 months of the study end date and stored at -  
29 80°C in a HTA licensed facility for future ethically approved research. These samples may be  
30 stored indefinitely.  
31

##### 32 Objectively measured physical activity and sleep

33 Participants will be asked to wear an accelerometer (GENEActiv, ActivInsights Ltd, Kimbolton,  
34 UK) on their non-dominant wrist to quantify habitual levels of physical activity and sleep.  
35 Participants will wear the GENEActiv accelerometer 24 hours/day for up to 8 days. Alongside  
36 this participants will fill out a wake and sleep log for the days they wear the device. The  
37 device will be fitted on the day of their appointment and they will be provided with a pre-paid  
38 padded envelope addressed to the LDC in which to return the device and the wake/sleep log  
39 at the end of the assessment period.  
40  
41

##### 42 Diet and Energy Intake

43 We will use a self-administered 3-day food record. Participants will be given verbal and written  
44 instructions on how to complete the record and be asked to start completing it from their first  
45 eating occasion the following day. Timing, frequency and content of eating occasions will be  
46 recorded. Dietary data will be entered into a specialist dietary analysis online tool (Nutritics).  
47 Software will be used to estimate total energy intake, and macronutrient intake. The temporal  
48 distribution of energy intake will be determined using the methodology described by Reutrakul  
49 et al [11].  
50

##### 51 Well-being

52 Three questionnaires will be used: The Patient Health Questionnaire (PHQ-9) [28] The  
53 Diabetes Distress Scale- 17 (DDS-17) [29, 30] and the Self-Compassion Scale (SSC) [31].  
54  
55

##### 56 Description of Statistical Analysis

57 The statistical analysis will be agreed prior to the data being made available to the study  
58 statistician(s). Participant characteristics will be summarised using either mean and standard  
59 deviation or median and interquartile range for continuous variables as appropriate, and  
60

number and percentage for categorical variables. This will include the presentation of the number (percentage) of participants in each of the five different chronotype categories. Further stratification of the participant characteristics will be made according to the three categories of morning-evening types based on their MEQ score [7]. ANOVA or Kruskal Wallis, as appropriate, will be used to analyse the relationship between MEQ category and the descriptive continuous variables, and chi squared tests the relationship between MEQ category and descriptive categorical variables. Preliminary graphical and tabular examination of the data will be inspected for the correct statistical modelling assumptions.

For the primary outcome (HbA1c), linear regression analysis will compare HbA1c between early and late chronotypes, both with and without adjustment for confounding variables. The model will be fitted and reported with the MEQ category variable treated as a categorical variable, with early chronotype as the reference category. Additionally, the MEQ category variable will be modelled as a categorical variable with all five levels, and as a continuous variable to calculate p for trend across the five categories. Model 1 will be unadjusted. Model 2 will be adjusted for age, sex, ethnicity, BMI, duration of diabetes, family history of diabetes, whether currently administering anti-hypertensive medication, and whether taking an oral or injectable therapy for their diabetes [32]. Model 3 will be adjusted for all variables in model 2 plus dietary patterns. All secondary outcomes will be analysed using the same method as described above. Model assumptions will be checked and a more suitable model selected if these are not met. Subgroup analyses will be performed stratified by risk of OSA based on the STOP-BANG questionnaire (high risk vs not).

Statistical analyses tests will be two-sided with a 5% significance level. The primary analyses will use a complete case analysis so only people with complete MEQ and HbA1c data will be included in the analyses; missing outcomes will not be replaced. Sensitivity analyses will include all recruited participants by fitting the same models, but with missing data replaced using multiple imputation or another suitable method.

#### Ethics & dissemination

This study has received full ethical approval from the West Midlands - Black Country Research Ethics Committee (16/WM/0457) and is registered on clinicaltrials.gov (NCT02973412) and sponsored by The University of Leicester. Informed consent will be obtained before any data are collected. Each participant has the right to withdraw from the study at any time. In addition, the investigator may discontinue a participant from the study at any time if the investigator considers it necessary for any reason including; safety, study compliance or clinical reasons or if they withdraw their consent. The reason for withdrawal will be recorded in the CRF. However, participants will not need to provide a reason for their withdrawal if they do not wish not to do so. Unless the participant indicates otherwise, any data collected up to the point of consent withdrawal will be included in the final analysis

The results will be disseminated through publication in peer reviewed medical journal, relevant medical/health conferences and a summary report sent to patients.

#### Current study status

This study is currently actively recruiting with 664 participants of the 2247 target recruited upon submission of manuscript. Recruitment is planned to complete June 2021.

#### Author contributions

EMB, APH, EB, SC, LD, CLE, KK, JH, AVR, AS, TY and MJD devised the project, the main conceptual ideas and proof outline. EMB wrote the manuscript with input from all authors. EMB and LD prepared and submitted research for local regulatory approvals. MIP contributed statistical support and will conduct all analysis.

1  
2  
3  
4 Funding statement

5 This work was supported by the Lifestyle theme of the National Institute of Health Research  
6 (NIHR) Leicester Biomedical Research Centre (BRC).  
7

8 Competing interests statement

9 There are no competing interests with authors and this research.  
10

11 Data sharing

12 The data collected to date is unpublished therefore not available within the public domain.  
13 The research team can access this data. Once primary and secondary analysis have been  
14 completed dataset can be requested through the corresponding author.  
15  
16  
17  
18  
19  
20  
21  
22  
23  
24  
25  
26  
27  
28  
29  
30  
31  
32  
33  
34  
35  
36  
37

38 References

- 39  
40  
41 1. UK, D. *Number of people with diabetes reaches over 4 million*. 2016; Available from:  
42 [https://www.diabetes.org.uk/About\\_us/News/Number-of-people-with-diabetes-](https://www.diabetes.org.uk/About_us/News/Number-of-people-with-diabetes-reaches-over-4-million/)  
43 [reaches-over-4-million/](https://www.diabetes.org.uk/About_us/News/Number-of-people-with-diabetes-reaches-over-4-million/)  
44  
45 2. Grandner, M.A., et al., *Sleep: Important Considerations for the Prevention of*  
46 *Cardiovascular Disease*. *Current opinion in cardiology*, 2016. **31**(5): p. 551-565.  
47  
48 3. Gangwisch, J.E., et al., *Sleep Duration as a Risk Factor for Diabetes Incidence in a*  
49 *Large US Sample*. *Sleep*, 2007. **30**(12): p. 1667-1673.  
50  
51 4. HK, Y., *Sleep duration as a risk factor for the development of type 2 diabetes*.  
52 *Diabetes Care*, 2006. **29**(3): p. 657-61.  
53  
54 5. Theorell-Haglöw, J., et al., *Sleep duration and central obesity in women – Differences*  
55 *between short sleepers and long sleepers*. *Sleep Medicine*, 2012. **13**(8): p. 1079-  
56 1085.  
57  
58 6. Leng, Y., et al., *Sleep duration and risk of fatal and nonfatal stroke: A prospective*  
59 *study and meta-analysis*. *Neurology*, 2015. **84**(11): p. 1072-1079.  
60  
61 7. Shan, Z., et al., *Sleep Duration and Risk of Type 2 Diabetes: A Meta-analysis of*  
*Prospective Studies*. *Diabetes Care*, 2015. **38**(3): p. 529-537.

- 1
  - 2
  - 3
  - 4
  - 5
  - 6
  - 7
  - 8
  - 9
  - 10
  - 11
  - 12
  - 13
  - 14
  - 15
  - 16
  - 17
  - 18
  - 19
  - 20
  - 21
  - 22
  - 23
  - 24
  - 25
  - 26
  - 27
  - 28
  - 29
  - 30
  - 31
  - 32
  - 33
  - 34
  - 35
  - 36
  - 37
  - 38
  - 39
  - 40
  - 41
  - 42
  - 43
  - 44
  - 45
  - 46
  - 47
  - 48
  - 49
  - 50
  - 51
  - 52
  - 53
  - 54
  - 55
  - 56
  - 57
  - 58
  - 59
  - 60
8. UK, T.S.C. *The Great British Sleep Report 2013* [cited 06/10/2018].
9. Horne JA, O.O., *A self-assessment questionnaire to determine morningness-eveningness in human circadian rhythms*. *International Journal of Chronobiology*, 1976. **4**(2): p. 97-110.
10. Merikanto, I., et al., *Associations of Chronotype and Sleep With Cardiovascular Diseases and Type 2 Diabetes*. *Chronobiology International*, 2013. **30**(4): p. 470-477.
11. Reutrakul, S., et al., *Chronotype Is Independently Associated With Glycemic Control in Type 2 Diabetes*. *Diabetes Care*, 2013. **36**(9): p. 2523-2529.
12. Vetter, C., et al., *Mismatch of Sleep and Work Timing and Risk of Type 2 Diabetes*. *Diabetes Care*, 2015. **38**(9): p. 1707-1713.
13. Van Cauter, E., et al., *Modulation of glucose regulation and insulin secretion by circadian rhythmicity and sleep*. *Journal of Clinical Investigation*, 1991. **88**(3): p. 934-942.
14. Spiegel, K., R. Leproult, and E. Van Cauter, *Impact of sleep debt on metabolic and endocrine function*. *The Lancet*, 1999. **354**(9188): p. 1435-1439.
15. Spiegel, K., et al., *Brief Communication: Sleep Curtailment in Healthy Young Men Is Associated with Decreased Leptin Levels, Elevated Ghrelin Levels, and Increased Hunger and Appetite*. *Annals of Internal Medicine*, 2004. **141**(11): p. 846-850.
16. Wittmann, M., et al., *Social Jetlag: Misalignment of Biological and Social Time*. *Chronobiology International*, 2006. **23**(1-2): p. 497-509.
17. Roenneberg, T., et al., *Social Jetlag and Obesity*. *Current Biology*, 2012. **22**(10): p. 939-943.
18. Juliana Castilhos Beauvalet, C.L.Q., Melissa Alves Braga de Oliveira, Carlos Augusto Vieira Ilgenfritz, Maria Paz Loayza Hidalgo, André Comiran Tonon<sup>1</sup>, *Social jetlag in health and behavioral research: a systematic review*. *ChronoPhysiology and Therapy*, 2017. **2017**(7): p. 19-31.
19. Jankowski, K.S., *Actual versus preferred sleep times as a proxy of biological time for social jet lag*. *Chronobiology International*, 2017. **34**(9): p. 1175-1176.
20. Jankowski, K.S., *Social jet lag: Sleep-corrected formula*. *Chronobiol Int*, 2017. **34**(4): p. 531-535.
21. Taillard, J., et al., *Validation of Horne and Ostberg Morningness-Eveningness Questionnaire in a Middle-Aged Population of French Workers*. *Journal of Biological Rhythms*, 2004. **19**(1): p. 76-86.
22. Besson, H., et al., *Estimating physical activity energy expenditure, sedentary time, and physical activity intensity by self-report in adults*. *The American Journal of Clinical Nutrition*, 2010. **91**(1): p. 106-114.
23. Erridge, C., *The capacity of foodstuffs to induce innate immune activation of human monocytes in vitro is dependent on food content of stimulants of Toll-like receptors 2 and 4*. *Br J Nutr*, 2011. **105**(1): p. 15-23.
24. Johns, M.W., *A new method for measuring daytime sleepiness: the Epworth sleepiness scale*. *Sleep*, 1991. **14**(6): p. 540-5.
25. Ravani, P., et al., *The Duke Activity Status Index in patients with chronic kidney disease: a reliability study*. *Clin J Am Soc Nephrol*, 2012. **7**(4): p. 573-80.
26. Ince, P., et al., *Use of the SINBAD classification system and score in comparing outcome of foot ulcer management on three continents*. *Diabetes Care*, 2008. **31**(5): p. 964-7.

- 1  
2  
3 27. Puthoff, M.L., *Outcome measures in cardiopulmonary physical therapy: short*  
4 *physical performance battery*. *Cardiopulm Phys Ther J*, 2008. **19**(1): p. 17-22.  
5  
6 28. Kroenke, K., R.L. Spitzer, and J.B. Williams, *The Phq-9*. *Journal of general internal*  
7 *medicine*, 2001. **16**(9): p. 606-613.  
8  
9 29. Fisher, L., et al., *Development of a brief diabetes distress screening instrument*. *The*  
10 *Annals of Family Medicine*, 2008. **6**(3): p. 246-252.  
11  
12 30. Polonsky, W.H., et al., *Assessing Psychosocial Distress in Diabetes*. *Development of*  
13 *the Diabetes Distress Scale*, 2005. **28**(3): p. 626-631.  
14  
15 31. Neff, K.D., *The development and validation of a scale to measure self-compassion*.  
16 *Self and identity*, 2003. **2**(3): p. 223-250.  
17  
18 32. Gray, L.J., et al., *The Leicester Risk Assessment score for detecting undiagnosed*  
19 *Type 2 diabetes and impaired glucose regulation for use in a multiethnic UK setting*.  
20 *Diabet Med*, 2010. **27**(8): p. 887-95.  
21  
22

23 Funding statement

24 Author contributions

25 Competing interests statement  
26  
27  
28  
29  
30  
31  
32  
33  
34  
35  
36  
37  
38  
39  
40  
41  
42  
43  
44  
45  
46  
47  
48  
49  
50  
51  
52  
53  
54  
55  
56  
57  
58  
59  
60

# BMJ Open

## The rationale and design of a cross-sectional study to investigate and describe the Chronotype of Patients with Type 2 Diabetes and the Effect on Glycaemic Control: The CODEC study

|                                 |                                                                                                                                                                                                                                                                                                                                                                                                                                                                                                                                                                                                                                                                                                                                                                                                                                                                                                                                 |
|---------------------------------|---------------------------------------------------------------------------------------------------------------------------------------------------------------------------------------------------------------------------------------------------------------------------------------------------------------------------------------------------------------------------------------------------------------------------------------------------------------------------------------------------------------------------------------------------------------------------------------------------------------------------------------------------------------------------------------------------------------------------------------------------------------------------------------------------------------------------------------------------------------------------------------------------------------------------------|
| Journal:                        | <i>BMJ Open</i>                                                                                                                                                                                                                                                                                                                                                                                                                                                                                                                                                                                                                                                                                                                                                                                                                                                                                                                 |
| Manuscript ID                   | bmjopen-2018-027773.R1                                                                                                                                                                                                                                                                                                                                                                                                                                                                                                                                                                                                                                                                                                                                                                                                                                                                                                          |
| Article Type:                   | Protocol                                                                                                                                                                                                                                                                                                                                                                                                                                                                                                                                                                                                                                                                                                                                                                                                                                                                                                                        |
| Date Submitted by the Author:   | 04-Oct-2019                                                                                                                                                                                                                                                                                                                                                                                                                                                                                                                                                                                                                                                                                                                                                                                                                                                                                                                     |
| Complete List of Authors:       | Brady, Emer M.; NHS Trust, Leicester Diabetes Centre<br>Hall, Andrew; NHS Trust, Leicester Diabetes Centre<br>Baldry, Emma; NIHR Leicester-Loughborough Diet, Lifestyle and Physical Activity Biomedical Research Unit, UK,<br>Chatterjee, Sudesna; University of Leicester, Leicester Diabetes Centre<br>Daniels, Lois; NHS Trust, Leicester Diabetes Centre<br>Edwardson, Charlotte; University of Leicester,<br>Khunti, Kamlesh; University of Leicester, Department of Health Sciences<br>Patel, Mubarak; University of Leicester, Leicester Diabetes Centre<br>Henson, Joseph; NIHR Leicester-Loughborough Diet, Lifestyle and Physical Activity Biomedical Research Unit, UK<br>Rowlands, Alex; Diabetes Research Centre. University of Leicester.<br>Leicester<br>Smith, Alice<br>Yates, Thomas; University of Leicester, Diabetes Research Centre<br>Davies, Melanie; University of Leicester, Diabetes Research Centre |
| <b>Primary Subject Heading</b>: | Diabetes and endocrinology                                                                                                                                                                                                                                                                                                                                                                                                                                                                                                                                                                                                                                                                                                                                                                                                                                                                                                      |
| Secondary Subject Heading:      | Nutrition and metabolism                                                                                                                                                                                                                                                                                                                                                                                                                                                                                                                                                                                                                                                                                                                                                                                                                                                                                                        |
| Keywords:                       | Chronotype,, social jet-lag, Type-2-diabetes, cardiometabolic health, lifestyle, Sleep medicine < ANAESTHETICS                                                                                                                                                                                                                                                                                                                                                                                                                                                                                                                                                                                                                                                                                                                                                                                                                  |
|                                 |                                                                                                                                                                                                                                                                                                                                                                                                                                                                                                                                                                                                                                                                                                                                                                                                                                                                                                                                 |

SCHOLARONE™  
Manuscripts

1  
2  
3  
4  
5  
6  
7  
8  
9  
10  
11  
12  
13  
14

# The rationale and design of a cross-sectional study to investigate and describe the Chronotype of Patients with Type 2 Diabetes and the Effect on Glycaemic Control: The CODEC study

15 EM Brady<sup>1</sup>, AP Hall<sup>2</sup>, E Baldry<sup>1</sup>, S Chatterjee<sup>3</sup>, L Daniels<sup>1</sup>, CL Edwardson<sup>3</sup>, K Khunti<sup>3</sup>, MI  
16 Patel<sup>3</sup>, J Henson<sup>3</sup>, AV Rowlands<sup>3</sup>, A Smith<sup>4</sup>, T Yates<sup>3</sup>, MJ Davies<sup>3</sup>.

17  
18  
19

## *Affiliations*

20  
21  
22  
23

<sup>1</sup>Leicester Diabetes Centre, University Hospitals of Leicester NHS Trust, UK

<sup>2</sup>The Hanning Sleep Laboratory, University Hospitals of Leicester NHS Trust, UK

<sup>3</sup>Diabetes Research Centre, University of Leicester, UK

<sup>4</sup> John Walls Renal Unit, University Hospitals of Leicester NHS Trust, UK and Department of Infection, Immunity and Inflammation, University of Leicester, UK

24  
25  
26  
27  
28  
29  
30  
31  
32  
33  
34  
35  
36  
37  
38

39  
40  
41  
42  
43

Word Count: 3,498

44  
45

Corresponding author

Dr E M Brady

Leicester Diabetes Centre – Air

Leicester General Hospital

Gwendolen Road

Leicester

LE54PW

[emb29@le.ac.uk](mailto:emb29@le.ac.uk)

0116 258 8959

46  
47  
48  
49  
50  
51  
52  
53  
54  
55  
56  
57  
58  
59  
60

## **Abstract**

### *Introduction*

A person's chronotype is their entrained preference for sleep time within the 24-hour clock. It is described by the well-known concept of the 'lark' (early riser) and 'owl' (late sleeper). Evidence suggests that the 'owl' is metabolically disadvantaged due to the standard organisation of our society which favours the 'lark' and places physiological stresses on this chronotype. The aim of this study is to explore cardiometabolic health between the lark and owl in a population with an established metabolic condition - Type 2 Diabetes.

### *Methods*

This cross-sectional, multi-site study aims to recruit 2247 participants from both secondary and primary care settings. The primary objective is to compare glycaemic control between late and early chronotypes. Secondary objectives include determining if late-chronotype is associated with poorer cardiometabolic health and other lifestyle factors, including well-being, compared to early-chronotype; describing the prevalence of the five different chronotypes in this cohort and examining the trends in glycaemic control, cardiometabolic health, well-being and lifestyle factors across chronotype.

### *Analysis*

The primary outcome (HbA1c), linear regression analysis will compare HbA1c between early and late chronotypes, with and without adjustment for confounding variables. Chronotype will be modelled as a categorical variable with all five levels (from extreme-morning to extreme-late type), and as a continuous variable to calculate p for trend across the five categories. A number of models will be created; unadjusted through to adjusted with age, sex, ethnicity, BMI, duration of diabetes, family history of diabetes, current medication and dietary habits. All secondary outcomes will be analysed using the same method.

### *Ethics*

1  
2  
3 Ethical approval from the West Midlands - Black Country Research Ethics Committee  
4  
5 (16/WM/0457).  
6  
7  
8  
9

### 10 *Dissemination*

11 The results will be disseminated through publication in peer reviewed medical journal,  
12  
13 relevant medical/health conferences and a summary report sent to patients.  
14  
15  
16  
17

### 18 *Registration details*

19  
20 Registered on clinicaltrials.gov NCT02973412 (23.11.20116)  
21  
22  
23  
24  
25  
26

### 27 **Article summary**

28 Strengths and limitations of this study (up to 5 bullet points no longer than 1 sentence  
29  
30 relating to methods)  
31  
32  
33  
34

- 35 • A large phenotyped cohort of patients with established T2DM for chronotype, levels  
36 of social jet lag and other parameters of sleep, physical activity and dietary  
37 behaviours and timing in addition to cardio-metabolic profiling.  
38
- 39 • Objective and subjective measures chronotype, levels of social jet lag and other  
40 parameters of sleep and physical activity in this large cohort collected.  
41
- 42 • Cross-sectional study design therefore cannot establish causality of any identified  
43 associations.  
44  
45  
46  
47  
48  
49  
50  
51

### 52 **Key Words**

53  
54 Chronotype, social jet-lag, Type-2-diabetes, cardiometabolic health, sleep medicine  
55  
56  
57  
58

### 59 **Introduction**

1  
2  
3 The incidence and prevalence of diabetes mellitus has now reached over 4 million in the UK  
4 [1]. Type 2 diabetes mellitus (T2DM) accounts for approximately 90% of the UK population  
5 with diabetes and confers significant morbidity and mortality on patients and healthcare  
6 systems. Despite new therapies and management tools to improve quality of life and  
7 outcomes for patients with T2DM, cardiovascular disease (CVD) remains the greatest cause  
8 of mortality. New paradigms for characterising and treating these patients could enhance  
9 current T2DM management.  
10  
11

12  
13 Recently, there has been considerable interest in the association between quantity and  
14 quality of sleep and circadian rhythms and the development of cardiometabolic disease  
15 especially metabolic syndrome, T2DM and CVD [2]. A “U”-shaped relationship exists  
16 between sleep duration and T2DM, obesity, CVD, hypertension and stroke [3-6]. A meta-  
17 analysis of nearly 500,000 individuals (~4% T2DM) identified a relative risk (RR) of 1.14  
18 (95% CI 1.03-1.26) for every additional hour of sleep and RR 1.09 (95% CI 1.04-1.15) with  
19 each hour of shorter sleep compared to 7-hours sleep per day for the development of T2DM  
20 [7]. The negative impact of poor sleep on health is not widely known and subsequently,  
21 lifestyle choices, societal pressures and shift-work are rendering the population chronically  
22 sleep deprived and thus at increased risk of metabolic dysfunction. Indeed, the Sleep  
23 Council estimates that one third of Britons sleep for just five-to-six hours per night which is  
24 well below the recommended 7-8 hours per night [8].  
25  
26

27  
28 Sleep is regulated, in part, by a homeostatic drive and is therefore unavoidable in humans  
29 (without sleep disorders). The circadian system, our internal clock, is also responsible for the  
30 regulation of sleep. Sleep is a multidimensional behaviour (and biological process) where we  
31 need to not only consider duration and quality but also timing. A person's sleep pattern, in  
32 relation to the 24-hour clock, i.e. timing, is individual to them and referred to as their  
33 chronotype. We can quantify these individual differences in daily timing using a number of  
34 questionnaire based tools and objectively using for example accelerometers.  
35  
36  
37  
38  
39  
40  
41  
42  
43  
44  
45  
46  
47  
48  
49  
50  
51  
52  
53  
54  
55  
56  
57  
58  
59  
60

1  
2  
3 Five different chronotypes have been identified using the 'Morningness-Eveningness'  
4 Questionnaire i.e. definite evening type, moderate evening type, intermediate, moderate  
5 morning type and definite morning type [9]. The identification of these different chronotypes,  
6 which describes preferred circadian phases, into, at the two extremes, the 'lark' (early riser)  
7 and 'owl' (late sleeper) has led to further research confirming that "owls" are at greater risk of  
8 cardiometabolic disease [10-12]. The underlying causes have not been clearly defined but  
9 appear to be related to circadian misalignment causing chronic sleep deprivation and leading  
10 to dysregulation of metabolic, immune and hormonal processes that govern energy  
11 regulation and glycaemic control [13-15].  
12  
13  
14  
15  
16  
17  
18  
19  
20  
21  
22

23 The concept of "social jetlag" has been developed to describe the deleterious effects of  
24 chronic sleep deprivation related to weekday occupational obligations on "evening types"  
25 and weekend social demands on "morning types" [16]. These social pressures result in a  
26 disconnect or misalignment of entrained preference for sleep time and actual sleep time.  
27 Evidence of the deleterious effects of social jetlag is emerging. For example, a large  
28 epidemiological study in Germany has shown that social jetlag is associated with obesity  
29 [17]. A recent systematic review reported associations between increasing levels of social  
30 jetlag and poorer mental health, epilepsy, cognitive impairment (e.g., work and academic  
31 performance), and adverse endocrine profiles [18].  
32  
33  
34  
35  
36  
37  
38  
39  
40  
41

42 Sleep is essential for human health however the mechanisms of sleep regulation are still not  
43 well established. There are limited data on objectively measured sleep and genetic variants  
44 that influence sleep traits such as chronotype [19]. Circadian rhythms have been shown not  
45 only to regulate sleep but several other physiological functions, including body temperature,  
46 physical activity, mood, and cognition. These processes are controlled by circadian clock  
47 genes. Conversely the timing of behaviours such as sleep, exercise, and food intake  
48 influence circadian rhythms, including clock gene expression [20] [21]  
49  
50  
51  
52  
53  
54  
55  
56  
57  
58  
59  
60

Further, individual components of phenotypic frailty, such as handgrip strength and walking

1  
2  
3 pace, and composite scores such as Short Physical Performance Battery (SPPB), are  
4 established risk factors for mortality, morbidity and disability [22, 23]. More generally, frailty,  
5 regardless of how it is defined, is associated with incident falls, difficulty with activities of daily  
6 living, disability, hospitalisation and death [24]. Whilst T2DM itself is associated with an  
7 elevated risk of mortality and health care utilisation, frailty magnifies these risks [25]. It is  
8 important to determine if there is an interaction between parameters of sleep, T2DM and  
9 individual components of frailty.  
10  
11  
12  
13  
14  
15  
16  
17  
18  
19  
20

21 In this cross-sectional observational study, we therefore propose to extensively phenotype a  
22 sample of patients who have an existing chronic metabolic condition - T2DM, to determine  
23 the impact of chronotype and levels of social jet lag on their glycaemic control, insulin  
24 resistance, biochemical and inflammatory profiles, and lifestyle behaviours using a variety of  
25 subjective and objective measures. This will build on the existing evidence base and permits  
26 exploration of the interrelationship between sleep behaviours, glycaemic control,  
27 cardiometabolic health and other lifestyle factors including physical fitness, wake-time  
28 activity and temporal eating habits in a multi-ethnic cohort with established T2DM  
29  
30  
31  
32  
33  
34  
35  
36  
37  
38  
39  
40

## 41 **Methods and analysis**

### 42 Study design and population

43 This is a cross-sectional, multi-site observational study design. Two thousand, two hundred  
44 and forty-seven patients with established T2DM (>6months), between the age of 18-75 years  
45 inclusive, without a current known sleep disorder (excluding Obstructive Sleep Apnoea  
46 (OSA)) will be recruited from both primary and secondary care settings from four sites across  
47 the East Midlands, UK.  
48  
49  
50  
51  
52  
53  
54  
55  
56  
57  
58

### 59 Inclusion/exclusion criteria

### *Inclusion Criteria*

- Participant is willing and able to give informed consent for participation in the study
- Established T2DM (>6months since diagnosis)
- Male or Female
- Aged 18-75 years inclusive
- BMI less than or equal to 45kg/m<sup>2</sup> inclusive
- No known sleep disorders except OSA
- HbA1c up to and below 10% (86mmol/mol)
- Type 1 Diabetes
- Good command of the English language

### *Exclusion Criteria*

- Participant is unwilling or unable to give informed consent
- Anyone without a good command of the English language
- Anyone <18 years of age and >75 years of age
- HbA1c above 10% (86mmol/mol)
- BMI greater than 45 kg/m<sup>2</sup>
- A regular cannabis user ie weekly use
- Have a terminal illness
- A known sleep disorder that is not OSA
- Regular use (≥ weekly) of the following medications;
  - wakefulness promoting agents Modafinil, Amphetamine derivatives, Methylphenidate
  - sedatives including benzodiazepines, Z-drugs (zopiclone, zolpidem & zaleplon)
  - Melatonin, including Circadin and melatonin analogues
  - Clonazepam and other drugs for nocturnal movement disorders

## Sample Size

The primary objective is to determine if late-chronotype is associated with poorer glycaemic control compared to early-chronotype in this multi-ethnic cohort with established T2DM as assessed by HbA1c. In order to detect a minimum clinically significant difference in HbA1c of 0.4% between the two groups, assuming a standard deviation of 1.8% [7,8], power of 80%, significance level of 5% and aiming to recruit approximately 50% morning type, 40% intermediate and 10% evening types [8], 1910 participants were required. This has been inflated by 15% to include incomplete dataset collection and withdrawal of consent. Therefore, a total of 2247 participants with T2DM are required for this study.

Secondary outcomes include; determining the prevalence of different chronotypes in this patient population, determine if late-chronotype is associated with poorer cardiometabolic health and other lifestyle factors, including physical fitness, well-being, compared to early-chronotype. We will describe the prevalence and phenotype of the five different chronotypes in a multi-ethnic UK population with established T2DM. Finally we will examine the trends in glycaemic control, cardiometabolic health, well-being and lifestyle factors across the five chronotype categories. All of the above will be explored within the context of social jet lag using a number of definitions for this construct [16, 26, 27]. Mid-sleep time (as an objective measure of chronotype) and other sleep parameters will be calculated from the accelerometer data.

## Study Assessments

This study involves a single data collection visit lasting approximately 1-1.5 hours. No data will be collected until informed consent has been provided by the participant. Where possible,

1  
2  
3 data collection will be integrated with pre-planned clinic appointments within outpatient  
4 departments. Where this is not possible, and for those recruited from primary care, specific  
5 study data collection visits will be arranged locally.  
6  
7  
8  
9

#### 10 11 Routine data

12  
13 The following data will be taken (where possible) from the patients notes following their  
14 routine appointment if they are recruited via either secondary or primary care, otherwise this  
15 data will be collected at their data collection appointment: date of birth, ethnicity, gender,  
16 HbA1c, random plasma glucose, full lipid profile, LFTs, eGFR, Creatinine, blood pressure,  
17 weight, body mass index (BMI) and waist circumference.  
18  
19  
20  
21  
22  
23  
24  
25

#### 26 Additional study-related data to be collected

##### 27 Bioimpedance assessment

28  
29 We will conduct a bioimpedance assessment (BIA) on participants to determine body  
30 composition. We will use a TANITA® professional body composition monitor (SA 165A-  
31 095OU-3, Sino-American Electronics Co.Ltd, Taiwan).  
32  
33  
34  
35  
36  
37  
38

##### 39 Questionnaires

40  
41 A number of questionnaire will be administered to obtain self-reported measures of a number  
42 of outcomes detailed in the table 1.  
43  
44  
45  
46  
47

| Outcome        | Questionnaire                                | Items | Time complete (mins) | Score                                                                                      |
|----------------|----------------------------------------------|-------|----------------------|--------------------------------------------------------------------------------------------|
| Chronotype [9] | 'Morningness-Eveningness Questionnaire (MEQ) | 19    | 5                    | 16-86 and is categorised into 3 groups ranging from evening (16-53) to morning (64-86)[28] |

|                                                               |                                                              |    |   |                                                                                                                                         |
|---------------------------------------------------------------|--------------------------------------------------------------|----|---|-----------------------------------------------------------------------------------------------------------------------------------------|
| Physical activity [29]                                        | Recent Physical Activity Questionnaire (RPAQ)                | 57 | 5 | Metabolic cost in metabolic equivalent tasks (MET) is calculated – overall and for each section                                         |
| Intake of Pathogen Associated Molecular Patterns (PAMPs) [30] | Pathogen Associated Molecular Patterns (PAMPs) Questionnaire | 13 | 5 | 0-5 all questions except questions 9 and 10 (0-4). Total provides the global score.                                                     |
| Risk of OSA                                                   | STOP-BANG Questionnaire                                      | 8  | 2 | A score of 5-8 indicates a high probability of moderate-severe OSA.                                                                     |
| Excessive daytime sleepiness [31]                             | Epworth Sleepiness Scale (ESS)                               | 8  | 2 | A total score between 0-9 indicative of no-daytime sleepiness, 10-12 borderline, >12 describes excessive daytime sleepiness.            |
| Physical function [32]                                        | Duke Activity Status Index (DASI)                            | 12 | 5 | The final score is the sum of all those questions returning a 'yes' with a higher score indicating a higher level of physical function. |

Table 1: Questionnaires used in CODEC study

1  
2  
3 SINBAD and foot characteristics (only applicable to patients recruited in diabetes foot  
4 clinics)[33]For patients recruited from diabetes foot clinics, the SINBAD score will be  
5 calculated. The SINBAD score is a classification system and score which compares outcomes  
6 of foot ulcer management. It is derived by six factors; Site, Ischemia, Neuropathy, Bacterial  
7 infection, Area, Depth.  
8  
9  
10  
11  
12  
13  
14  
15

16 The participants offloading foot cast information will also be recorded. For this there are five  
17 categories:  
18

- 19 • Below knee non-removable device/cast
  - 20 • Below knee removable device/cast
  - 21 • Non-removable foot device/cast
  - 22 • Removable foot device/cast
  - 23 • Usual orthotic/own shoes
- 24  
25  
26  
27  
28  
29  
30  
31  
32

### 33 Medical History

34  
35 Family history pertaining to cardiovascular disease, diabetes, obesity and depression will be  
36 obtained. Medical history will be collected and current concomitant medication in addition to  
37 smoking status and duration of diabetes. All those with an existing diagnosis of Obstructive  
38 Sleep Apnoea (OSA) will have the severity of their condition and compliance to therapy  
39 recorded. This will be collected in the Case Report Form by the study clinician, research  
40 nurse or other appropriately trained member of the research team. Further, previous  
41 employment pertaining to previous night shift work for retired participants will be collected.  
42  
43  
44  
45  
46  
47  
48  
49  
50  
51  
52  
53

### 54 Biochemistry

55  
56 Fasted venous blood samples (at least 4 hours of abstinence from food and anything other  
57 than water to drink) will be taken (9ml EDTA) for the quantification of biological markers of  
58  
59  
60

1  
2  
3 metabolism and inflammation (e.g.; hsCRP, IL-6, Leptin, Adiponectin) and a sample for C-  
4 peptide and insulin (2.7ml Lithium Heparin). These will be centrifuged and plasma aliquoted  
5  
6 at source and stored at -80C at the Leicester Diabetes Department (LDC). Samples will be  
7  
8 analysed for hsCRP, IL-6, Leptin, Adiponectin in batch, the remaining aliquots will be stored  
9  
10 for future research, and this may be indefinitely.  
11  
12  
13  
14  
15

## 16 Physical Performance

### 17 Hand grip strength

18  
19 Grip strength will be measured, using a digital hand held dynamometer, three times on each  
20  
21 side, with the elbow flexed at a right angle and the forearm in neutral position. The maximum  
22  
23 of the readings generated is taken as the maximum grip strength.  
24  
25  
26  
27

### 28 Short Physical Performance Battery (SPPB)

29  
30 The SPPB measures balance, gait speed and ability to stand from a chair and has been  
31  
32 shown to measure the risk of disability and mortality [34]. It comprises of the tests outlined;  
33  
34  
35  
36

- 37 • Chair stands: The participant will start from a seated position on a hard, upright chair  
38 (such as a dining chair), with the feet flat on the floor and the knees bent at 90°. For  
39 the test, the time taken for the participant to stand up fully and then returning to sitting,  
40 without using the hands 5 times is measured.  
41  
42
- 43 • Standing balance: Tests in three progressive positions. If the participant is able to  
44 complete 10 seconds in the specified position then the starting position is progressed  
45 to the next stage:
  - 46 ○ Feet together
  - 47 ○ Semi-tandem
  - 48 ○ Tandem
- 49 • Gait speed: The time taken for the participant to walk 4m on a level course. It is  
50  
51  
52  
53  
54  
55  
56  
57  
58  
59  
60

1  
2  
3 measured a second time after a short break.  
4  
5  
6

#### 7 Sit-to-stand 60 test (STS60) 8

9 This test is similar to the chair standing test from the SPPB, but it measures how many times  
10 the participant can stand from a chair in 60 seconds. It is a surrogate measure of muscular  
11 endurance, therefore providing data on an additional marker of physical ability.  
12  
13  
14  
15

#### 16 17 18 Sub-studies

##### 19 20 Genetics

21  
22 From the viewpoint of elucidating physiological mechanisms and managing disease risk, it is  
23 important to examine the relationship between chronotype and social jetlag and circadian  
24 rhythms, including clock gene expression. We will use the analysis of clock genes from a  
25 venous blood sample to examine the reciprocal impact of behaviour on circadian rhythm.  
26  
27 With a focus on clock genes and genes that increase the risk of diabetes and obesity. This  
28 will be a 9ml EDTA sample of whole blood that will be transferred within 12 months of the  
29 study end date and stored at -80°C in a HTA licensed facility for future ethically approved  
30 research. These samples may be stored indefinitely.  
31  
32  
33  
34  
35  
36  
37  
38  
39  
40  
41

##### 42 Objectively measured physical activity and sleep

43  
44 Participants will be asked to wear an accelerometer (GENEActiv, ActivInsights Ltd, Kimbolton,  
45 UK) on their non-dominant wrist to quantify habitual levels of physical activity and sleep.  
46  
47 Participants will wear the GENEActiv accelerometer 24 hours/day for up to 8 days. Alongside  
48 this participants will fill out a wake and sleep log for the days they wear the device. The  
49 device will be fitted on the day of their appointment and they will be provided with a pre-paid  
50 padded envelope addressed to the LDC in which to return the device and the wake/sleep log  
51 at the end of the assessment period.  
52  
53  
54  
55  
56  
57  
58  
59  
60

## Diet and Energy Intake

We will use a self-administered 3-day food record. Participants will be given verbal and written instructions on how to complete the record and be asked to start completing it from their first eating occasion the following day. Timing, frequency and content of eating occasions will be recorded. Dietary data will be entered into a specialist dietary analysis online tool (Nutritics). Software will be used to estimate total energy intake, and macronutrient intake. The temporal distribution of energy intake will be determined using the methodology described by Reutrakul et al [11].

## Well-being

Three questionnaires will be used: The Patient Health Questionnaire (PHQ-9) [35]. The Diabetes Distress Scale- 17 (DDS-17) [36-38] and the Self-Compassion Scale (SSC) [39].

## Description of Statistical Analysis

The statistical analysis will be agreed prior to the data being made available to the study statistician(s). Participant characteristics will be summarised using either mean and standard deviation or median and interquartile range for continuous variables as appropriate, and number and percentage for categorical variables. This will include the presentation of the number (percentage) of participants in each of the five different chronotype categories. Further stratification of the participant characteristics will be made according to the three categories of morning-evening types based on their MEQ score [7]. ANOVA or Kruskal Wallis, as appropriate, will be used to analyse the relationship between MEQ category and the descriptive continuous variables, and chi squared tests the relationship between MEQ category and descriptive categorical variables. Preliminary graphical and tabular examination of the data will be inspected for the correct statistical modelling assumptions.

For the primary outcome (HbA1c), linear regression analysis will compare HbA1c between early and late chronotypes, both with and without adjustment for confounding variables. The

1  
2  
3 model will be fitted and reported with the MEQ category variable treated as a categorical  
4 variable, with early chronotype as the reference category. Additionally, the MEQ category  
5 variable will be modelled as a categorical variable with all five levels, and as a continuous  
6 variable to calculate p for trend across the five categories. Model 1 will be unadjusted. Model  
7  
8  
9  
10  
11 Model 2 will be adjusted for age, sex, ethnicity, BMI, duration of diabetes, family history of diabetes,  
12  
13 whether currently administering anti-hypertensive medication, and whether taking an oral or  
14  
15 injectable therapy for their diabetes [40]. Model 3 will be adjusted for all variables in model 2  
16  
17 plus dietary patterns. All secondary outcomes will be analysed using the same method as  
18  
19 described above. Model assumptions will be checked and a more suitable model selected if  
20  
21 these are not met. Subgroup analyses will be performed stratified by risk of OSA based on  
22  
23 the STOP-BANG questionnaire (high risk vs not).  
24  
25  
26  
27

28  
29 Statistical analyses tests will be two-sided with a 5% significance level. The primary analyses  
30  
31 will use a complete case analysis so only people with complete MEQ and HbA1c data will be  
32  
33 included in the analyses; missing outcomes will not be replaced. Sensitivity analyses will  
34  
35 include all recruited participants by fitting the same models, but with missing data replaced  
36  
37 using multiple imputation or another suitable method.  
38  
39  
40  
41  
42

### 43 Patient and Public Involvement

44  
45  
46

47  
48 The development of the research question and outcome measures were presented and  
49  
50 discussed at the Leicester Diabetes Centre Patient and Public Forum where it was agreed  
51  
52 that the 'sleep' is not well understood or discussed in consultations with doctors at diabetes  
53  
54 annual reviews (as is routine practice within England) or other such consultations. Specific  
55  
56 contribution from PPI include the methods used to collect dietary information and the  
57  
58 inclusion of the sub-studies as optional for participants because some people may feel  
59  
60 overburdened with these measures. Patients were not involved in the recruitment to or

1  
2  
3 conduct of the study. The results of the study will be disseminated to study participants by  
4 way of a newsletter and invitation to 'results' evening at the end of the study. At this event  
5 summary results will be presented and any conference posters will be displayed and provided  
6 in a 'results booklet'.  
7  
8  
9  
10

#### 11 12 13 14 15 16 Ethics & dissemination

17  
18 This study has received full ethical approval from the West Midlands - Black Country  
19 Research Ethics Committee (16/WM/0457) and is registered on clinicaltrials.gov  
20 (NCT02973412) and sponsored by The University of Leicester. Informed consent will be  
21 obtained before any data are collected. Each participant has the right to withdraw from the  
22 study at any time. In addition, the investigator may discontinue a participant from the study at  
23 any time if the investigator considers it necessary for any reason including; safety, study  
24 compliance or clinical reasons or if they withdraw their consent. The reason for withdrawal  
25 will be recorded in the CRF. However, participants will not need to provide a reason for their  
26 withdrawal if they do not wish not to do so. Unless the participant indicates otherwise, any  
27 data collected up to the point of consent withdrawal will be included in the final analysis  
28  
29  
30  
31  
32  
33  
34  
35  
36  
37  
38  
39  
40  
41

42 The results will be disseminated through publication in peer reviewed medical journal,  
43 relevant medical/health conferences and a summary report sent to and presented to patients.  
44  
45  
46  
47

#### 48 Current study status

49  
50 This study is currently actively recruiting with 664 participants of the 2247 target recruited  
51 upon submission of manuscript. Recruitment is planned to complete June 2021.  
52  
53  
54  
55  
56  
57  
58  
59  
60

### Author contributions

EMB, APH, EB, SC, LD, CLE, KK, JH, AVR, AS, TY and MJD devised the project, the main conceptual ideas and proof outline. EMB wrote the manuscript with input from all authors. EMB and LD prepared and submitted research for local regulatory approvals. MIP contributed statistical support and will conduct all analysis.

### Acknowledgement Statement

The authors would like to thank and acknowledge the contribution of members of Leicester Diabetes Centre Patient and Public Forum in the design of this study.

### Funding statement

This work was supported by the Lifestyle theme of the National Institute of Health Research (NIHR) Leicester Biomedical Research Centre (BRC).

### Competing interests statement

There are no competing interests with authors and this research.

### Data sharing

The data collected to date is unpublished therefore not available within the public domain. The research team can access this data. Once primary and secondary analysis have been completed dataset can be requested through the corresponding author.

## References

1. UK, D. *Number of people with diabetes reaches over 4 million*. 2016; Available from: [https://www.diabetes.org.uk/About\\_us/News/Number-of-people-with-diabetes-reaches-over-4-million/](https://www.diabetes.org.uk/About_us/News/Number-of-people-with-diabetes-reaches-over-4-million/)
2. Grandner, M.A., et al., *Sleep: Important Considerations for the Prevention of Cardiovascular Disease*. *Current opinion in cardiology*, 2016. **31**(5): p. 551-565.
3. Gangwisch, J.E., et al., *Sleep Duration as a Risk Factor for Diabetes Incidence in a Large US Sample*. *Sleep*, 2007. **30**(12): p. 1667-1673.
4. Yaggi, H., A. Araujo, and J. McKinlay, *Sleep Duration as a Risk Factor for the Development of Type 2 Diabetes*. *Diabetes care*, 2006. **29**: p. 657-61.
5. Theorell-Haglöw, J., et al., *Sleep duration and central obesity in women – Differences between short sleepers and long sleepers*. *Sleep Medicine*, 2012. **13**(8): p. 1079-1085.

- 1
  - 2
  - 3
  - 4
  - 5
  - 6
  - 7
  - 8
  - 9
  - 10
  - 11
  - 12
  - 13
  - 14
  - 15
  - 16
  - 17
  - 18
  - 19
  - 20
  - 21
  - 22
  - 23
  - 24
  - 25
  - 26
  - 27
  - 28
  - 29
  - 30
  - 31
  - 32
  - 33
  - 34
  - 35
  - 36
  - 37
  - 38
  - 39
  - 40
  - 41
  - 42
  - 43
  - 44
  - 45
  - 46
  - 47
  - 48
  - 49
  - 50
  - 51
  - 52
  - 53
  - 54
  - 55
  - 56
  - 57
  - 58
  - 59
  - 60
6. Leng, Y., et al., *Sleep duration and risk of fatal and nonfatal stroke: A prospective study and meta-analysis*. *Neurology*, 2015. **84**(11): p. 1072-1079.
7. Shan, Z., et al., *Sleep Duration and Risk of Type 2 Diabetes: A Meta-analysis of Prospective Studies*. *Diabetes Care*, 2015. **38**(3): p. 529-537.
8. Sleepio, *The Great British Sleep Survey 2012* 2013.
9. Horne JA, O.O., *A self-assessment questionnaire to determine morningness-eveningness in human circadian rhythms*. *International Journal of Chronobiology*, 1976. **4**(2): p. 97-110.
10. Merikanto, I., et al., *Associations of Chronotype and Sleep With Cardiovascular Diseases and Type 2 Diabetes*. *Chronobiology International*, 2013. **30**(4): p. 470-477.
11. Reutrakul, S., et al., *Chronotype Is Independently Associated With Glycemic Control in Type 2 Diabetes*. *Diabetes Care*, 2013. **36**(9): p. 2523-2529.
12. Vetter, C., et al., *Mismatch of Sleep and Work Timing and Risk of Type 2 Diabetes*. *Diabetes Care*, 2015. **38**(9): p. 1707-1713.
13. Van Cauter, E., et al., *Modulation of glucose regulation and insulin secretion by circadian rhythmicity and sleep*. *Journal of Clinical Investigation*, 1991. **88**(3): p. 934-942.
14. Spiegel, K., R. Leproult, and E. Van Cauter, *Impact of sleep debt on metabolic and endocrine function*. *The Lancet*, 1999. **354**(9188): p. 1435-1439.
15. Spiegel, K., et al., *Brief Communication: Sleep Curtailment in Healthy Young Men Is Associated with Decreased Leptin Levels, Elevated Ghrelin Levels, and Increased Hunger and Appetite*. *Annals of Internal Medicine*, 2004. **141**(11): p. 846-850.
16. Wittmann, M., et al., *Social Jetlag: Misalignment of Biological and Social Time*. *Chronobiology International*, 2006. **23**(1-2): p. 497-509.

- 1  
2  
3 17. Roenneberg, T., et al., *Social Jetlag and Obesity*. Current Biology, 2012. **22**(10): p.  
4 939-943.  
5  
6
- 7  
8 18. Beauvalet, J., et al., *Social jetlag in health and behavioral research: a systematic*  
9 *review*. ChronoPhysiology and Therapy, 2017. **7**: p. 19-31.  
10  
11
- 12 19. Jones, S.E., et al., *Genetic studies of accelerometer-based sleep measures yield*  
13 *new insights into human sleep behaviour*. Nature communications, 2019. **10**(1): p.  
14 1585-1585.  
15  
16
- 17 20. Garaulet, M. and J.A. Madrid, *Chronobiological aspects of nutrition, metabolic*  
18 *syndrome and obesity*. Adv Drug Deliv Rev, 2010. **62**(9-10): p. 967-78.  
19  
20
- 21 21. Takahashi, M., et al., *Chronotype and social jetlag influence human circadian clock*  
22 *gene expression*. Scientific reports, 2018. **8**(1): p. 10152-10152.  
23  
24
- 25 22. Yates, T., et al., *Association of walking pace and handgrip strength with all-cause,*  
26 *cardiovascular, and cancer mortality: a UK Biobank observational study*. Eur Heart J,  
27 2017. **38**(43): p. 3232-3240.  
28  
29
- 30 23. Pavasini, R., et al., *Short Physical Performance Battery and all-cause mortality:*  
31 *systematic review and meta-analysis*. BMC Med, 2016. **14**(1): p. 215.  
32  
33
- 34 24. Fried, L.P., et al., *Frailty in older adults: evidence for a phenotype*. J Gerontol A Biol  
35 *Sci Med Sci*, 2001. **56**(3): p. M146-56.  
36  
37
- 38 25. Chao, C.-T., J. Wang, and K.-L. Chien, *Both pre-frailty and frailty increase healthcare*  
39 *utilization and adverse health outcomes in patients with type 2 diabetes mellitus*.  
40 *Cardiovascular Diabetology*, 2018. **17**.  
41  
42
- 43 26. Jankowski, K.S., *Actual versus preferred sleep times as a proxy of biological time for*  
44 *social jet lag*. Chronobiology International, 2017. **34**(9): p. 1175-1176.  
45  
46
- 47 27. Jankowski, K.S., *Social jet lag: Sleep-corrected formula*. Chronobiol Int, 2017. **34**(4):  
48 p. 531-535.  
49  
50  
51  
52  
53  
54  
55  
56  
57  
58  
59  
60

- 1  
2  
3 28. Taillard, J., et al., *Validation of Horne and Ostberg Morningness-Eveningness*  
4 *Questionnaire in a Middle-Aged Population of French Workers*. Journal of Biological  
5 Rhythms, 2004. **19**(1): p. 76-86.  
6  
7  
8  
9  
10 29. Besson, H., et al., *Estimating physical activity energy expenditure, sedentary time,*  
11 *and physical activity intensity by self-report in adults*. The American Journal of  
12 Clinical Nutrition, 2010. **91**(1): p. 106-114.  
13  
14  
15  
16 30. Erridge, C., *The capacity of foodstuffs to induce innate immune activation of human*  
17 *monocytes in vitro is dependent on food content of stimulants of Toll-like receptors 2*  
18 *and 4*. Br J Nutr, 2011. **105**(1): p. 15-23.  
19  
20  
21  
22  
23 31. Johns, M.W., *A new method for measuring daytime sleepiness: the Epworth*  
24 *sleepiness scale*. Sleep, 1991. **14**(6): p. 540-5.  
25  
26  
27  
28 32. Ravani, P., et al., *The Duke Activity Status Index in patients with chronic kidney*  
29 *disease: a reliability study*. Clin J Am Soc Nephrol, 2012. **7**(4): p. 573-80.  
30  
31  
32  
33 33. Ince, P., et al., *Use of the SINBAD classification system and score in comparing*  
34 *outcome of foot ulcer management on three continents*. Diabetes Care, 2008. **31**(5):  
35 p. 964-7.  
36  
37  
38  
39  
40 34. Puthoff, M.L., *Outcome measures in cardiopulmonary physical therapy: short*  
41 *physical performance battery*. Cardiopulmonary physical therapy journal, 2008. **19**(1):  
42 p. 17-22.  
43  
44  
45  
46 35. Kroenke, K., R.L. Spitzer, and J.B.W. Williams, *The PHQ-9*. Journal of General  
47 Internal Medicine, 2001. **16**(9): p. 606-613.  
48  
49  
50  
51 36. Fisher, L., et al., *Development of a brief diabetes distress screening instrument*. The  
52 Annals of Family Medicine, 2008. **6**(3): p. 246-252.  
53  
54  
55  
56 37. Polonsky, W.H., et al., *Assessing Psychosocial Distress in Diabetes*. Development of  
57 the Diabetes Distress Scale, 2005. **28**(3): p. 626-631.  
58  
59  
60

- 1  
2  
3 38. Polonsky, W.H., et al., *Assessing Psychosocial Distress in Diabetes: Development of*  
4 *the Diabetes Distress Scale*. *Diabetes Care* 2005. **28**(3): p. 626-631.  
5  
6  
7  
8 39. Neff, K.D., *The development and validation of a scale to measure self-compassion*.  
9 *Self and identity*, 2003. **2**(3): p. 223-250.  
10  
11  
12 40. Gray, L.J., et al., *The Leicester Risk Assessment score for detecting undiagnosed*  
13 *Type 2 diabetes and impaired glucose regulation for use in a multiethnic UK setting*.  
14 *Diabet Med*, 2010. **27**(8): p. 887-95.  
15  
16  
17  
18  
19  
20  
21  
22  
23  
24  
25  
26  
27  
28  
29  
30  
31  
32  
33  
34  
35  
36  
37  
38  
39  
40  
41  
42  
43  
44  
45  
46  
47  
48  
49  
50  
51  
52  
53  
54  
55  
56  
57  
58  
59  
60
